# Supplementary material for: Enzyme-Linked Aptamer Kits for Rapid, Visual, and Sensitive Determination of Lactoferrin in Dairy Products
Source: MDPI journal article supplement (doi:10.3390/foods11233763), 2022-11-22
Supplement: s1 [file s1]

# Enzyme-linked aptamer kits for rapid, visual and sensitive determination of lactoferrin in dairy products

Fan Zhang <sup>1,2</sup>, Hongxia Du <sup>1,2</sup>, Linsen Li <sup>3</sup>, Tengfei Li <sup>4</sup>, Jing Wang <sup>5</sup>, Zilei Chen <sup>1,2</sup>, Mengmeng Yan <sup>1,\*</sup>, Chao Zhu <sup>1,2,\*</sup> and Feng Qu <sup>3</sup>

<sup>1</sup> Institute of Quality Standard and Testing Technology for Agro-Products, Shandong Academy of Agricultural Sciences, Jinan 250100, China

<sup>2</sup> Shandong Provincial Key Laboratory Test Technology on Food Quality and Safety, Jinan, 250100, China

<sup>3</sup> Key Laboratory of Molecular Medicine and Biotherapy, School of Life Science, Beijing Institute of Technology, Beijing 100081, China

<sup>4</sup> School of Life Sciences and Food Engineering, Hebei University of Engineering, Handan 056038, China

<sup>5</sup> School of Materials Science and Engineering, Hebei University of Engineering, Handan 056038, China

\* Correspondence: ynkyl202@163.com (M.Y.); ndytzhuchao@126.com (C.Z.)

**Table S1.** The comparison of ELISA and ELAA.

| LOD (nM) | Detection strategy          | Detection duration (h) | reference |
|----------|-----------------------------|------------------------|-----------|
| 1.25     | Indirect competition(ELISA) | 1                      | [26]      |
| 5.25     | Direct Competition(ELISA)   | 1                      | [36]      |
| 40.38    | Sandwich method(ELISA)      | 2.75                   | [37]      |
| 225      | Direct Competition(ELISA)   | 2.5                    | [38]      |
| 14.01    | Indirect competition(ELAA)  | 1                      | this work |
